# Supplementary material for: Deep eutectic solvent assisted synthesis of dihydropyrimidinones/thiones via Biginelli reaction: theoretical investigations on their electronic and global reactivity descriptors
Source: Royal Society of Chemistry journal article supplement (doi:10.1039/d1nj03879f), 2021-01-01
Supplement: d1nj03879f1.pdf [file d1nj03879f1.pdf]

*Supporting information*

*for*

**Deep Eutectic Solvent Assisted Synthesis of  
Dihydropyrimidinones/thiones via Biginelli Reaction: Theoretical  
Investigations on their Electronic and Global Reactivity  
Descriptors**

M. Shaibuna,<sup>a</sup> Muhammed Jeneesh Kariyottu Kuniyil<sup>b</sup> and K. Sreekumar<sup>a\*</sup>

<sup>a</sup>Department of Applied Chemistry, Cochin University of Science and Technology, Cochin 682022, India.

<sup>b</sup>Department of Chemistry, Pondicherry University, R V Nagar, Kalapet, Puducherry 605 014, India

E-mail: K. Sreekumar- [kskpolymer.cusat@gmail.com](mailto:kskpolymer.cusat@gmail.com)

| Entry | Content                                                                            | Page no. |
|-------|------------------------------------------------------------------------------------|----------|
| 1     | Structures of synthesized products                                                 | 1        |
| 2     | Spectral data of the synthesized products                                          | 2-4      |
| 3     | GC- MS, <sup>1</sup> H and <sup>13</sup> C NMR spectra of the synthesized products | 5-21     |
| 4     | References                                                                         | 22       |

**Structures of the synthesised products**

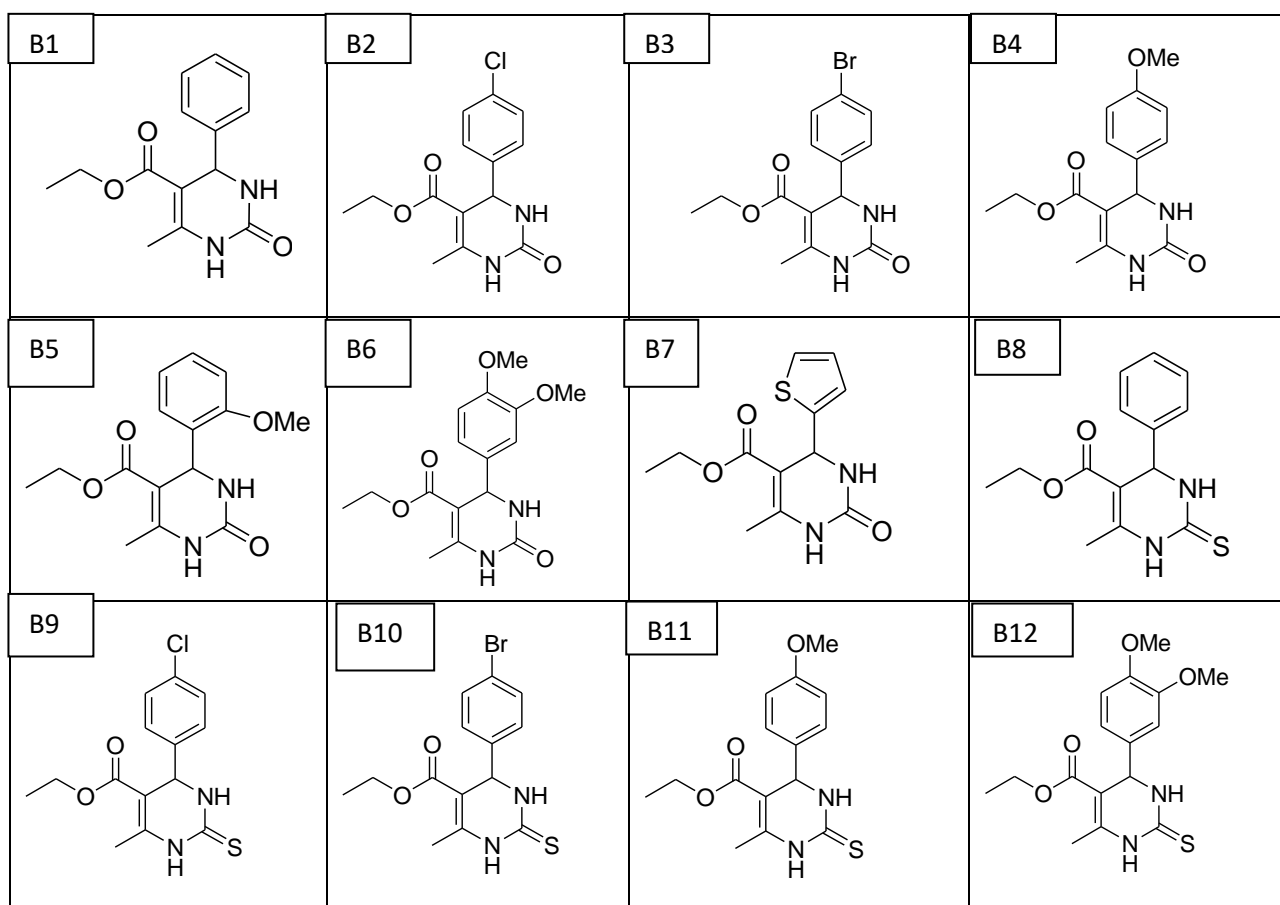

## Spectral data of the synthesized products

### 1. 5-Ethoxycarbonyl-6-methyl-4-phenyl-3,4-dihydropyrimidin-2(1H)-one (B1)

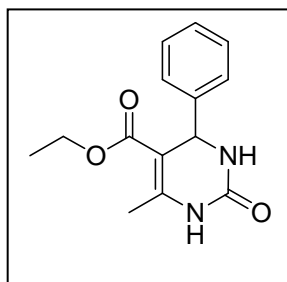

White solid, m. p. 203 °C (202–204 °C)<sup>1</sup>, GC-MS (M<sup>+</sup>): 260; <sup>1</sup>H NMR (CDCl<sub>3</sub>, 400 MHz) δ: 8.16 (s, 1H), 7.66(d, 5H), 7.29 (s, 1H), 5.38 (d, 1H), 4.06 (q, *J* = 7.1 Hz, 2H), 2.33 (s, 3H), 1.14 (t, *J* = 7.1 Hz, 3H); <sup>13</sup>C NMR (CDCl<sub>3</sub>, 100 MHz) δ: 165.7, 153.4, 146.3, 128.7, 128.0, 126.6, 101.4, 60.1, 55.8, 18.7, 14.2.

### 2. 5-(Ethoxycarbonyl)-4-(4-chlorophenyl)-6-methyl-3,4-dihydropyrimidin-2(1H)-one (B2)

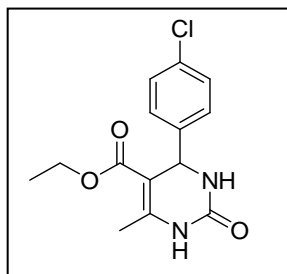

White solid, m. p. 213 °C (212–214 °C)<sup>1</sup>, GC-MS (M<sup>+</sup>): 294; <sup>1</sup>H NMR (CDCl<sub>3</sub>, 400 MHz) δ: 7.95 (s, 1H), 7.24-7.25(m, 4H), 5.36 (s, 1H), 4.05 (q, *J* = 7.1 Hz, 2H), 2.32 (s, 3H), 1.14 (t, *J* = 7.1 Hz, 3H); <sup>13</sup>C NMR (CDCl<sub>3</sub>, 100 MHz) δ: 165.5, 153.1, 146.4, 142.2, 133.8, 128.9, 128.1, 101.2, 60.2, 55.2, 18.8, 14.2.

### 3. 5-(Ethoxycarbonyl)-4-(4-bromophenyl)-6-methyl-3,4-dihydropyrimidin-2(1H)-one (B3)

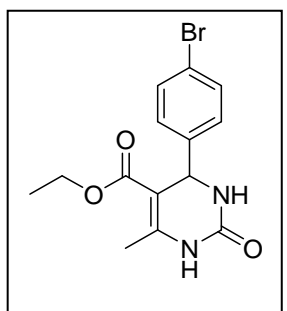

White solid, m. p. 152 °C (150–151 °C)<sup>2</sup>, GC-MS (M<sup>+</sup>): 338; <sup>1</sup>H NMR (DMSO-*d*<sub>6</sub>, 400 MHz) δ: 9.28 (s, 1H), 7.82 (s, 1H), 7.56 (d, *J* = 8.2 Hz, 2H), 7.21 (d, *J* = 8.2 Hz, 2H), 5.15 (s, 1H), 3.98 (q, *J* = 7.0 Hz, 2H), 2.26 (s, 3H), 1.09 (t, *J* = 7.0 Hz, 3H); <sup>13</sup>C NMR (DMSO-*d*<sub>6</sub>, 100 MHz) δ: 166.6, 153.1, 149.9, 145.3, 132.7, 129.7, 121.5, 99.9, 60.5, 54.6, 18.9, 15.2.

### 4. 5-(Ethoxycarbonyl)-6-methyl-4-(4-methoxyphenyl)-3,4-dihydropyrimidin-2(1H)-one (B4)

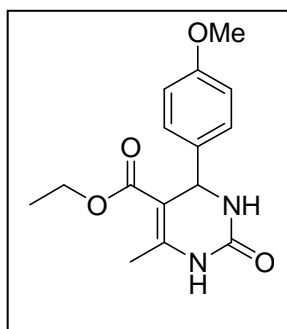

White solid, m. p. 204 °C (202-204 °C)<sup>1</sup>, GC-MS (M<sup>+</sup>): 290; <sup>1</sup>H NMR (DMSO-*d*<sub>6</sub>, 400 MHz) δ: 9.14 (s, 1H), 7.66 (s, 1H), 7.18 (d, *J* = 8.1 Hz, 2H), 6.86 (d, *J* = 8.1 Hz, 2H), 5.07 (s, 1H), 3.96 (q, *J* = 7.1 Hz, 2H), 3.70 (s, 3H), 2.23 (s, 3H), 1.12 (t, *J* = 7.1 Hz, 3H); <sup>13</sup>C NMR (DMSO-*d*<sub>6</sub>, 100 MHz) δ: 166.2, 159.2, 152.9, 148.8, 137.8, 128.1, 114.5, 100.3, 59.9, 55.8, 54.1, 18.5, 14.9.

**5. 5-(Ethoxycarbonyl)-6-methyl-4-(2-methoxyphenyl)-3,4-dihydropyrimidin-2(1H)-one (B5)**

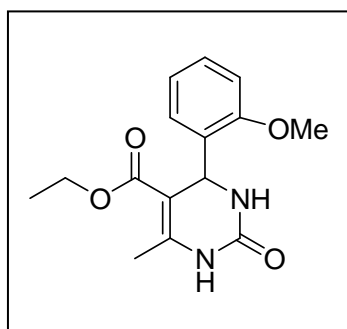

White solid, m. p. 145 °C (145- 146 °C)<sup>2</sup>, GC-MS (M<sup>+</sup>): 290; <sup>1</sup>H NMR (DMSO-*d*<sub>6</sub>, 400 MHz) δ: 7.52 (d, *J* = 3.29, 1H), 7.25- 7.21 (m, *J* = 8.42, 1H), 7.04 (dd, *J* = 1.65, *J* = 7.51, 1H), 6.96 (d, *J* = 8.06, 1H), 6.86 (t, *J* = 7.32, 1H), 5.46 (d, *J* = 3.29, 1H), 3.99-3.94 (m, 2H), 3.77 (s, 3H), 3.10 (s, 3H), 2.49 (s, 3H), 1.05 (t, *J* = 7.14, 3H); <sup>13</sup>C NMR (DMSO-*d*<sub>6</sub>, 100 MHz) δ 165.6, 156.6, 153.1, 150.4, 130.8, 128.7, 126.9, 120.1, 111.1, 101.1, 59.3, 55.4, 47.9, 29.6, 15.9, 13.9.

**6. 5-(Ethoxycarbonyl)-6-methyl-4-(3,4-dimethoxyphenyl)-3,4-dihydropyrimidin-2(1H)-one (B6)**

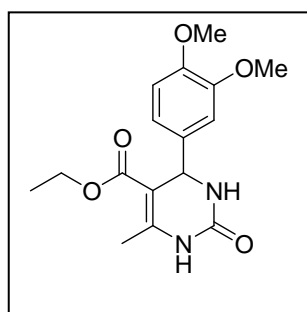

White solid, m. p. 176 °C (176- 177 °C)<sup>3</sup>, GC-MS (M<sup>+</sup>): 320; <sup>1</sup>H NMR (DMSO-*d*<sub>6</sub>, 400 MHz) δ: 8.95 (s, 1H), 7.25 (s, 1H), 6.85 (m, 1H), 6.80 (m, 2H), 5.25 (s, 1H), 4.05 (q, 2H, *J* = 7.0 Hz), 3.80 (s, 6H), 2.30 (s, 3H), 1.15 (t, 3H, *J* = 7.0 Hz); <sup>13</sup>C NMR (DMSO-*d*<sub>6</sub>, 100 MHz) δ: 165.6, 153.8, 148.9, 148.6, 146.1, 136.4, 118.5, 111.1, 109.9, 101.3, 59.9, 55.8, 55.1, 18.4, 8 14.1.

**7. 5-(Ethoxycarbonyl)-6-methyl-4-(2-thienyl)-3,4-dihydropyrimidin-2(1H)-one (B7)**

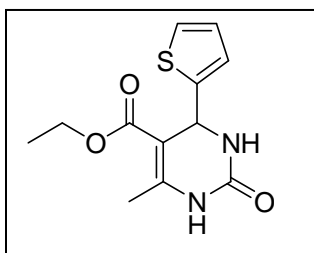

Brown solid, m. p. 216 °C (215-217 °C)<sup>1</sup>, GC-MS (M<sup>+</sup>): 266; <sup>1</sup>H NMR (CDCl<sub>3</sub>, 400 MHz) δ: 7.68 (s, 1H), 7.16 (d, 1H), 7.14 – 6.71 (m, 2H), 5.68 (s, 1H), 4.15 (q, 2H), 2.32 (s, 3H), 1.23 (t, 3H); <sup>13</sup>C NMR (CDCl<sub>3</sub>, 100 MHz) δ: 165.3, 153.1, 147.2, 146.4, 126.7, 124.9, 124.0, 101.8, 60.2, 50.8, 18.7, 14.2.

**8. 5-(Ethoxycarbonyl)-6-methyl-4-phenyl-3,4-dihydropyrimidin-2(1H)-thione (B8)**

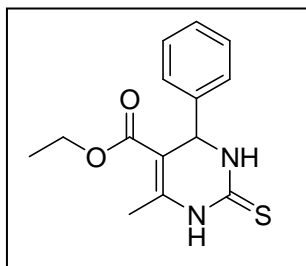

White solid, m. p. 209 °C (208-210 °C)<sup>1</sup>, GC-MS (M<sup>+</sup>): 276; <sup>1</sup>H NMR (CDCl<sub>3</sub>, 400 MHz) δ: 8.15 (s, 1H), 7.18-7.24 (m, 5H), 5.31 (s, 1H), 3.99 (q, *J* = 7.1 Hz, 2H), 2.28 (s, 3H), 1.06 (t, *J* =

7.1 Hz, 3H);  $^{13}\text{C}$  NMR ( $\text{CDCl}_3$ , 100 MHz)  $\delta$ : 174.5, 165.2, 142.7, 142.3, 128.8, 128.3, 126.8, 102.9, 60.4, 56.2, 18.3, 14.0.

**9. 5-(Ethoxycarbonyl)-4-(4-chlorophenyl)-6-methyl-3,4-dihydropyrimidin-2(1H)-thione (B9)**

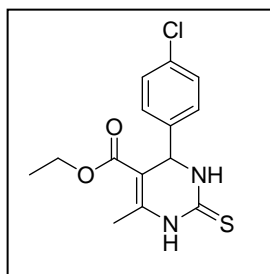

White solid, m. p. 193 °C (192-194 °C)<sup>1</sup>, GC-MS ( $\text{M}^+$ ): 310;  $^1\text{H}$  NMR ( $\text{CDCl}_3$ , 400 MHz)  $\delta$ : 8.34 (s, 1H), 7.89 (s, 1H), 7.13-7.22 (m, 5H), 5.29 (s, 1H), 4.02 (q,  $J = 7.0, 2.6$  Hz, 2H), 2.28 (s, 3H), 1.11 (t,  $J = 7.1$  Hz, 3H);  $^{13}\text{C}$  NMR ( $\text{CDCl}_3$ , 100 MHz)  $\delta$ : 174.3, 165.1, 143.1, 140.9, 129.0, 128.2, 102.6, 60.5, 55.4, 18.2, 14.1.

**10. 5-(Ethoxycarbonyl)-4-(4-bromophenyl)-6-methyl-3,4-dihydropyrimidin-2(1H)-thione (B10)**

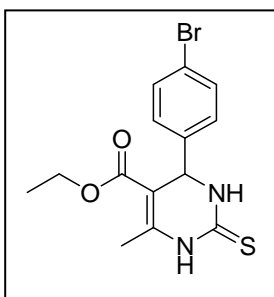

White solid, m. p. 183 °C (182 - 183 °C)<sup>2</sup>, GC-MS ( $\text{M}^+$ ): 336;  $^1\text{H}$ NMR ( $\text{DMSO-}d_6$ , 400 MHz)  $\delta$  10.38 (s, 1H), 9.66 (s, 1H), 7.56 (d,  $J = 8.42$ , 2H), 7.17 (d,  $J = 8.42$ , 2H), 5.15 (d,  $J = 3.66$ , 1H), 4.00 (q,  $J = 6.96, J = 13.51$ , 2H), 2.29 (s, 3H), 1.09 (t,  $J = 7.14$ , 3H);  $^{13}\text{C}$  NMR ( $\text{DMSO-}d_6$ , 100 MHz)  $\delta$ : 174.2, 164.9, 145.3, 142.7, 131.4, 128.6, 120.7, 100.2, 59.6, 53.5, 17.1.

**11. 5-(Ethoxycarbonyl)-6-methyl-4-(4-methoxyphenyl)-3,4-dihydropyrimidin-2(1H)-thione (B11)**

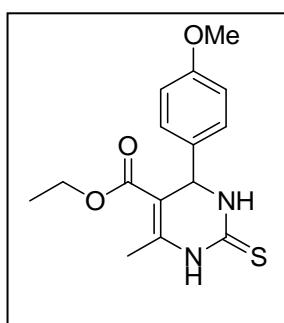

White solid, m. p. 151 °C (150-152 °C)<sup>1</sup>, GC-MS ( $\text{M}^+$ ): 306;  $^1\text{H}$  NMR ( $\text{DMSO-}d_6$ , 400 MHz)  $\delta$ : 10.29 (s, 1H), 9.59 (s, 1H), 7.14-6.87 (m, 4H), 5.10 (s, 1H), 3.99 (q,  $J = 7.0$  Hz, 2H), 3.71 (s, 3H), 2.27 (s, 3H), 1.09 (t,  $J = 7.1$  Hz, 3H);  $^{13}\text{C}$  NMR ( $\text{DMSO-}d_6$ , 100 MHz)  $\delta$ : 174.0, 165.2, 158.8, 144.7, 135.8, 127.7, 113.9, 101.1, 59.6, 55.1, 53.5, 17.2, 14.1.

**12. 5-(Ethoxycarbonyl)-6-methyl-4-(3,4-dimethoxyphenyl)-3,4-dihydropyrimidin-2(1H)-thione (B12)**

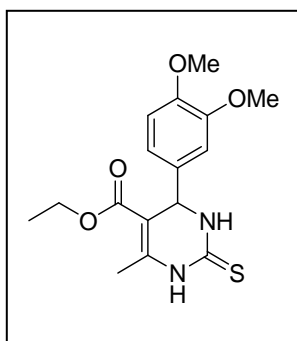

White solid, m. p. 177 °C (178 °C)<sup>4</sup>, GC-MS ( $\text{M}^+$ ): 336;  $^1\text{H}$  NMR ( $\text{DMSO-}d_6$ , 400 MHz)  $\delta$ : 10.29 (s, 1H), 9.59 (s, 1H), 6.91(d,  $J = 8.2$ , 1H), 6.84 (s, 1H), 6.70 (d,  $J = 8.2$ , 1H), 5.13 (s, 1H), 4.03 (q,  $J = 7.1$ , 2H), 3.73 (s, 6H), 2.30 (s, 3H), 1.13 (t,  $J = 7.1$ , 3H);  $^{13}\text{C}$  NMR ( $\text{DMSO-}d_6$ , 100 MHz)  $\delta$ : 173.9, 164.9, 148.3, 148.1, 144.5, 135.7, 117.9, 111.6, , 110.2, 100.6, 59.3, , 55.2, 53.3, 16.9, 13.8.

Gas chromatogram and mass spectrum of B1 (MW: 260)

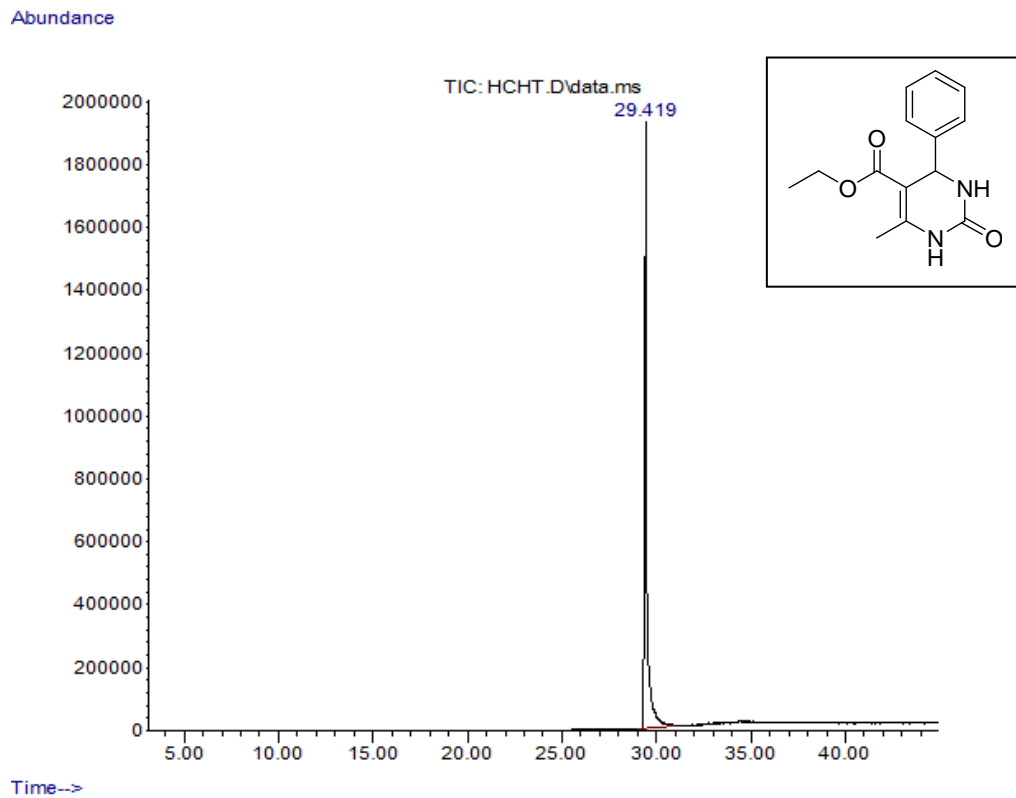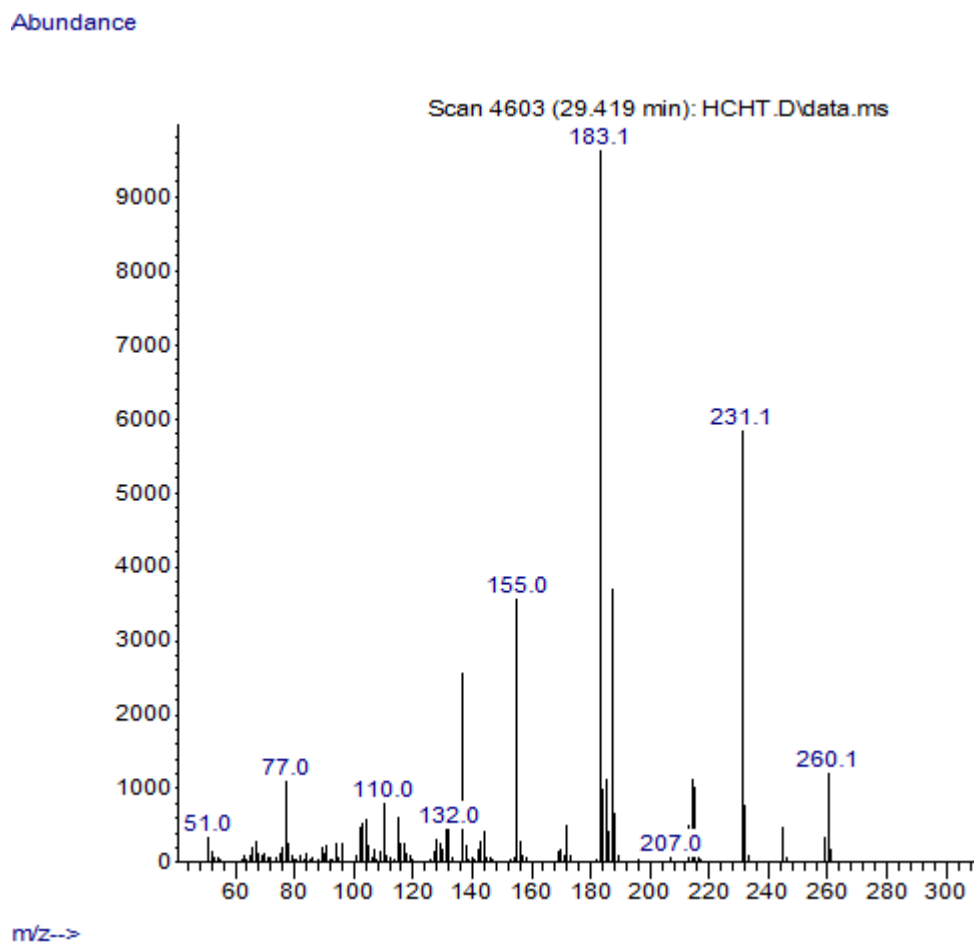

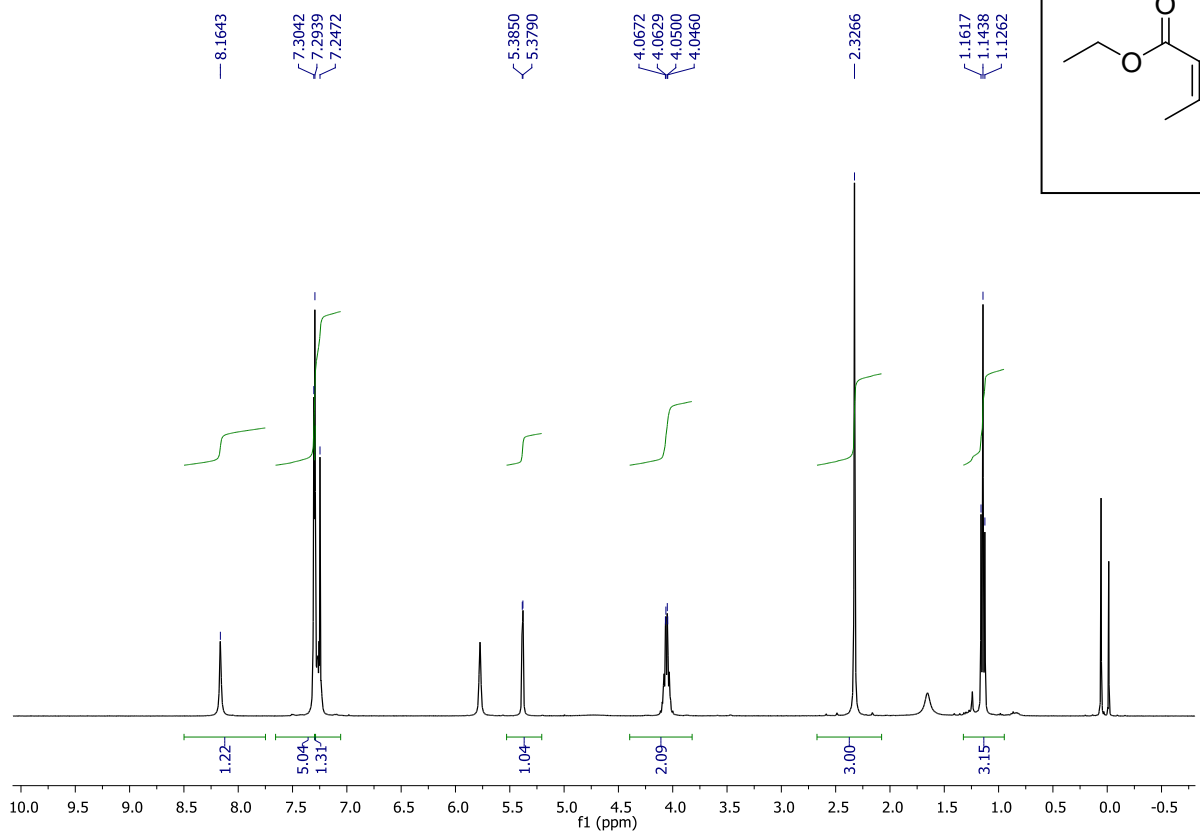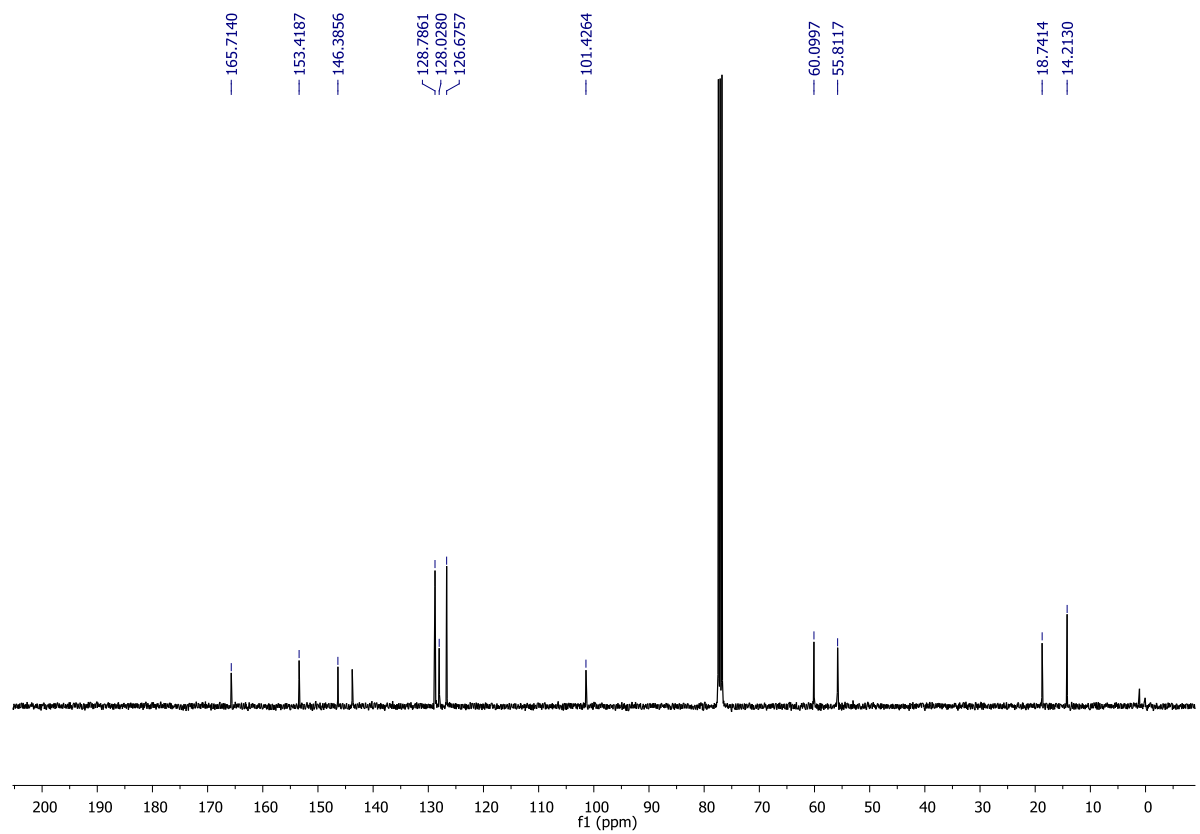

# Gas chromatogram and mass spectrum of B2 (MW: 294)

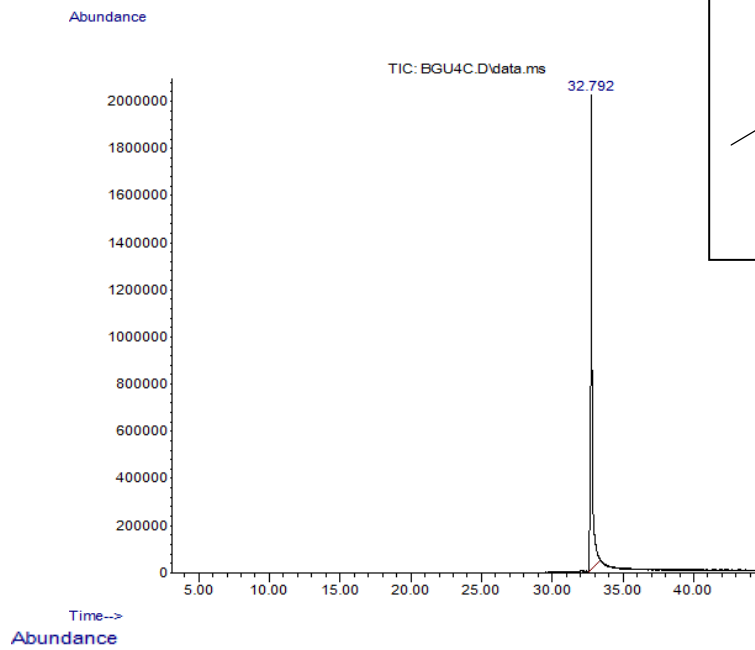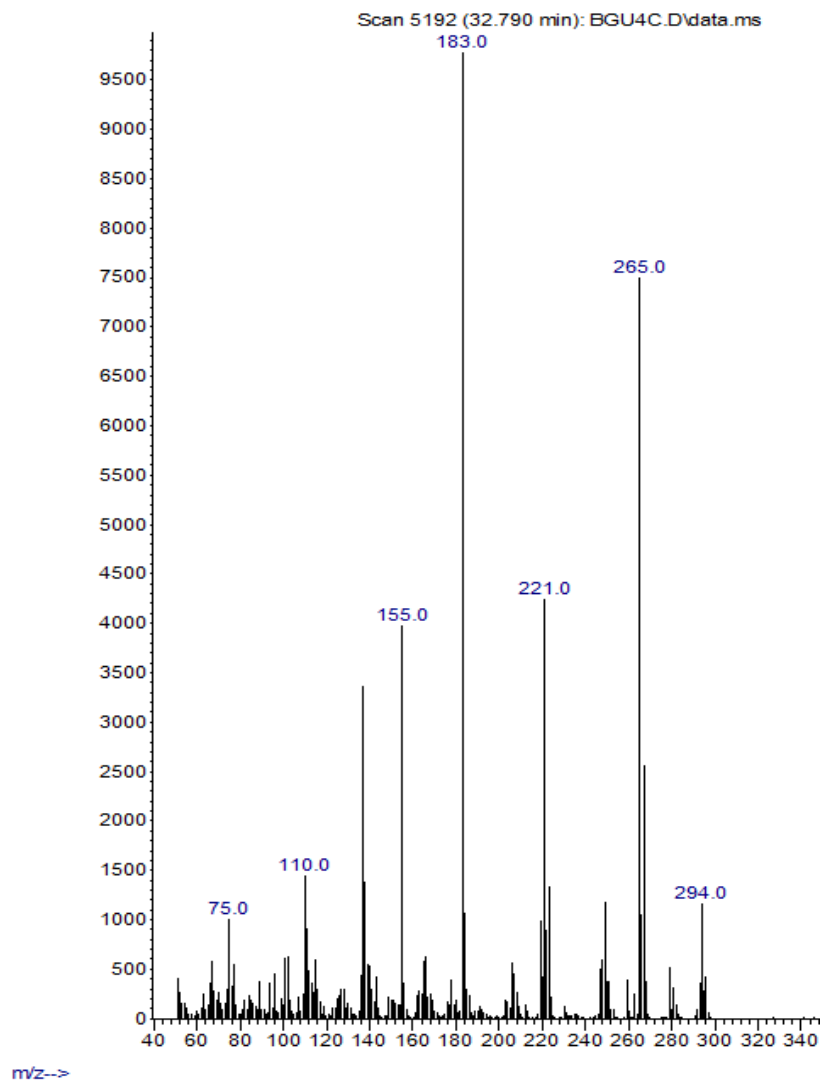

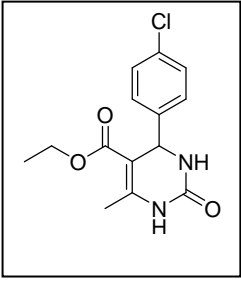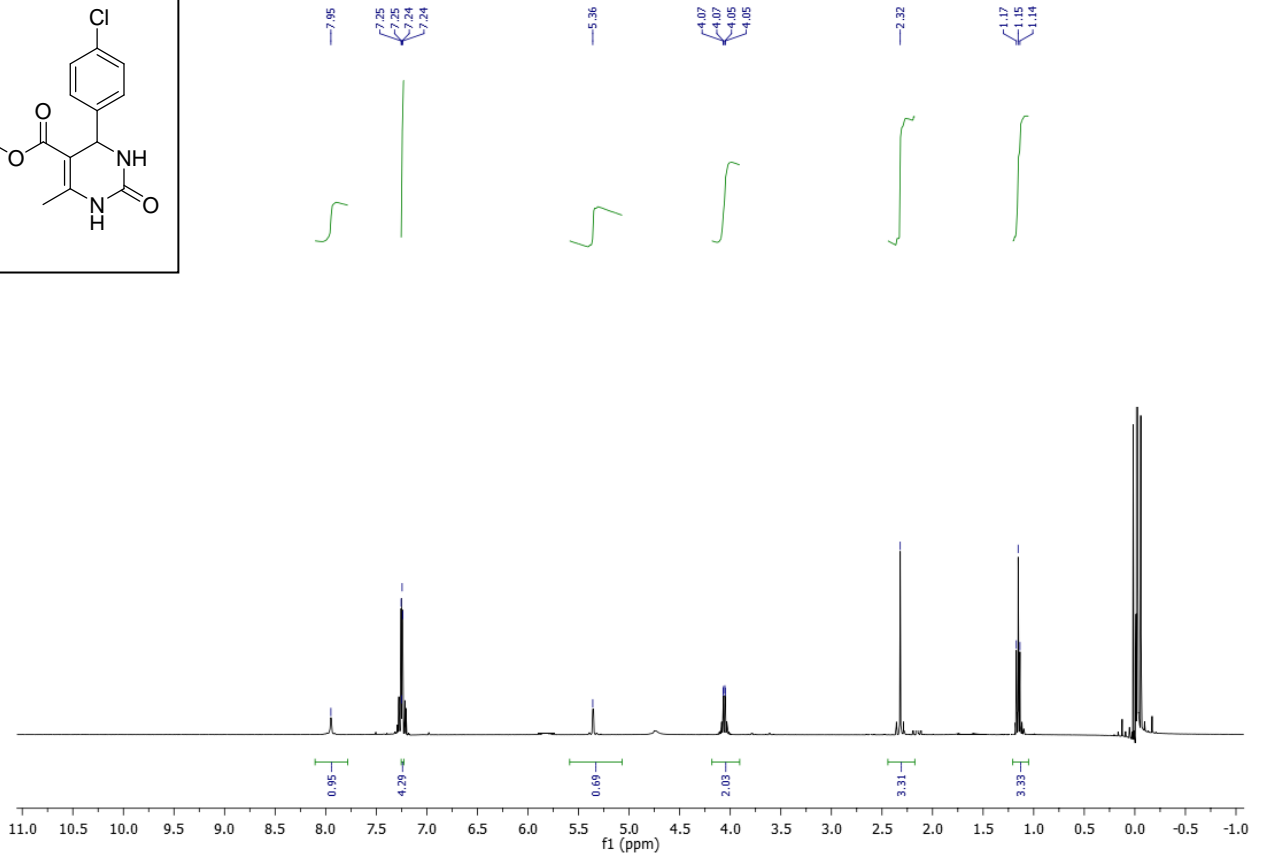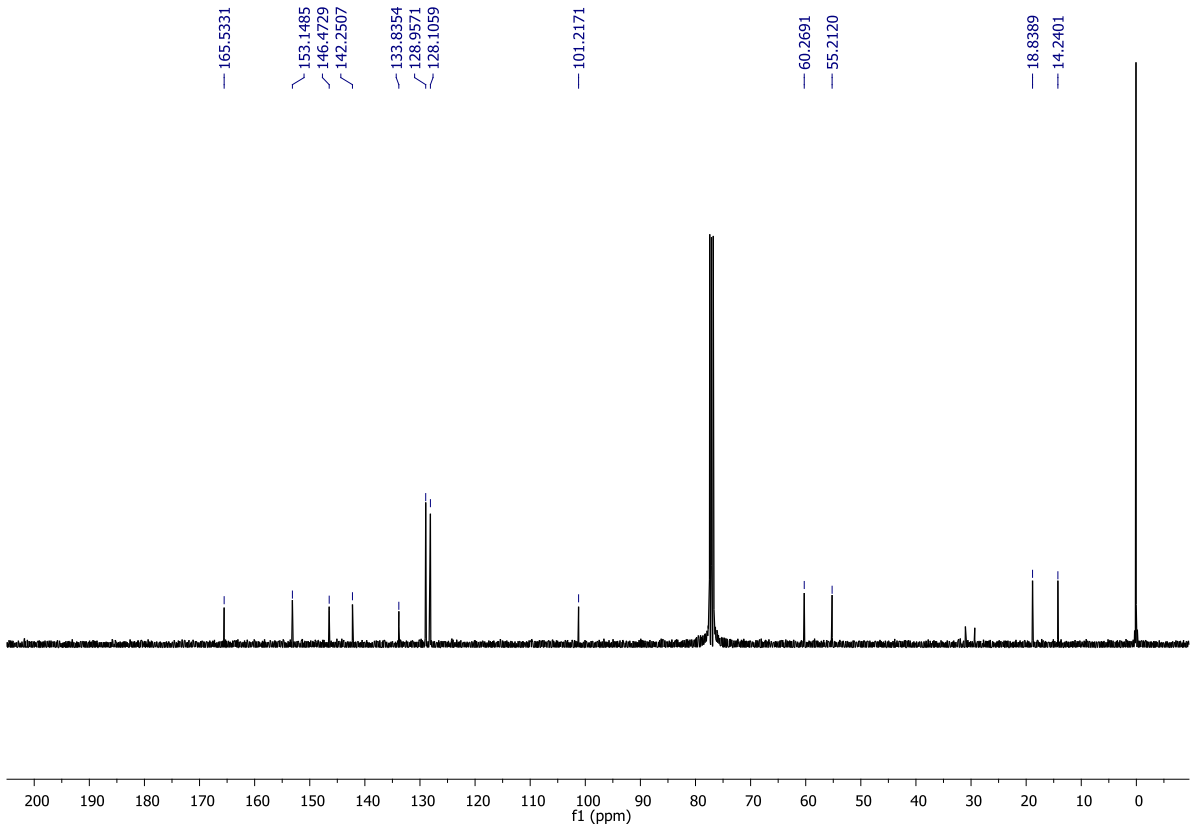



# Gas chromatogram and mass spectrum of B3 (MW: 339)

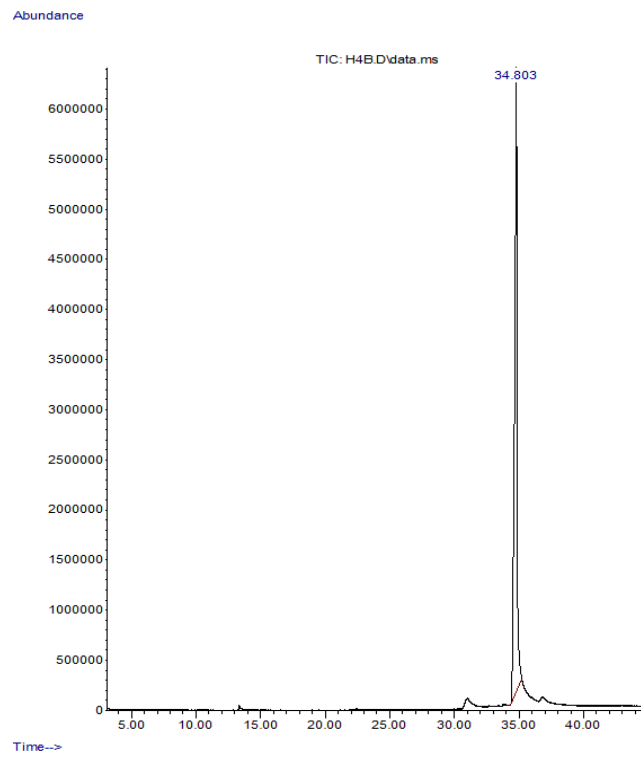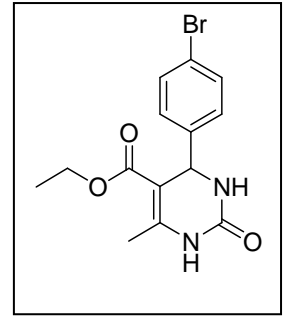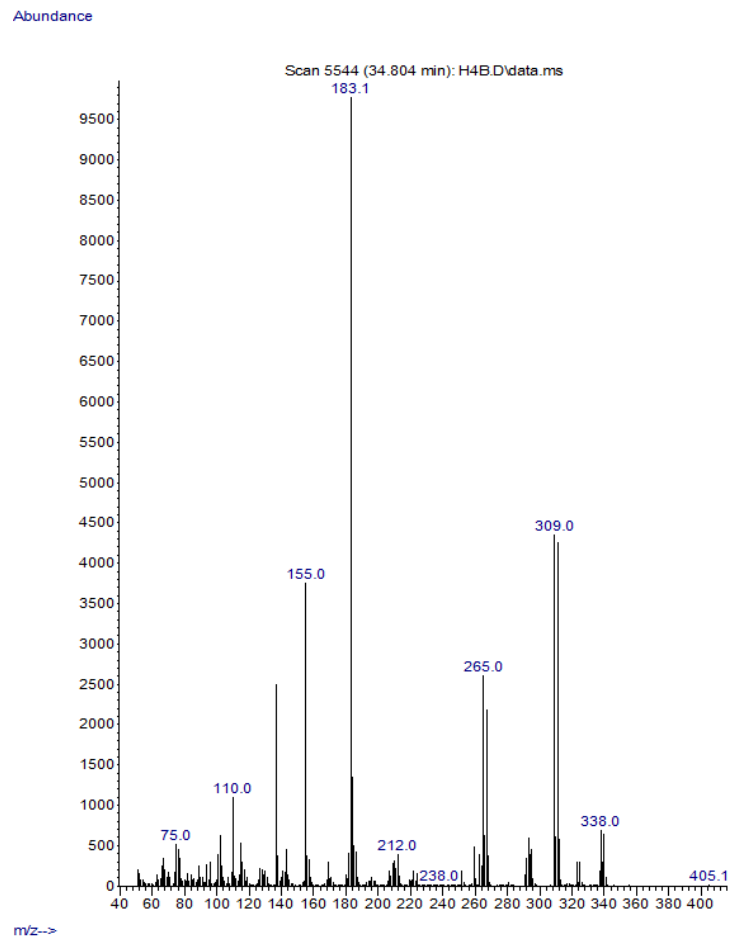

Gas chromatogram and mass spectrum of B4 (MW: 290)

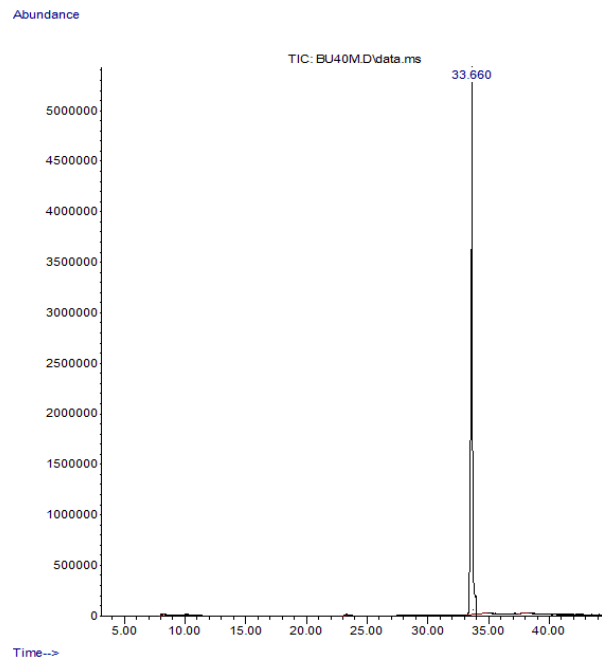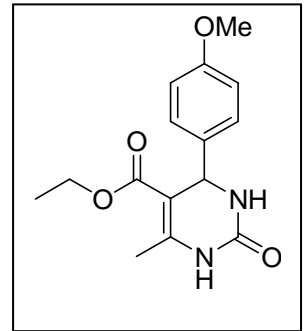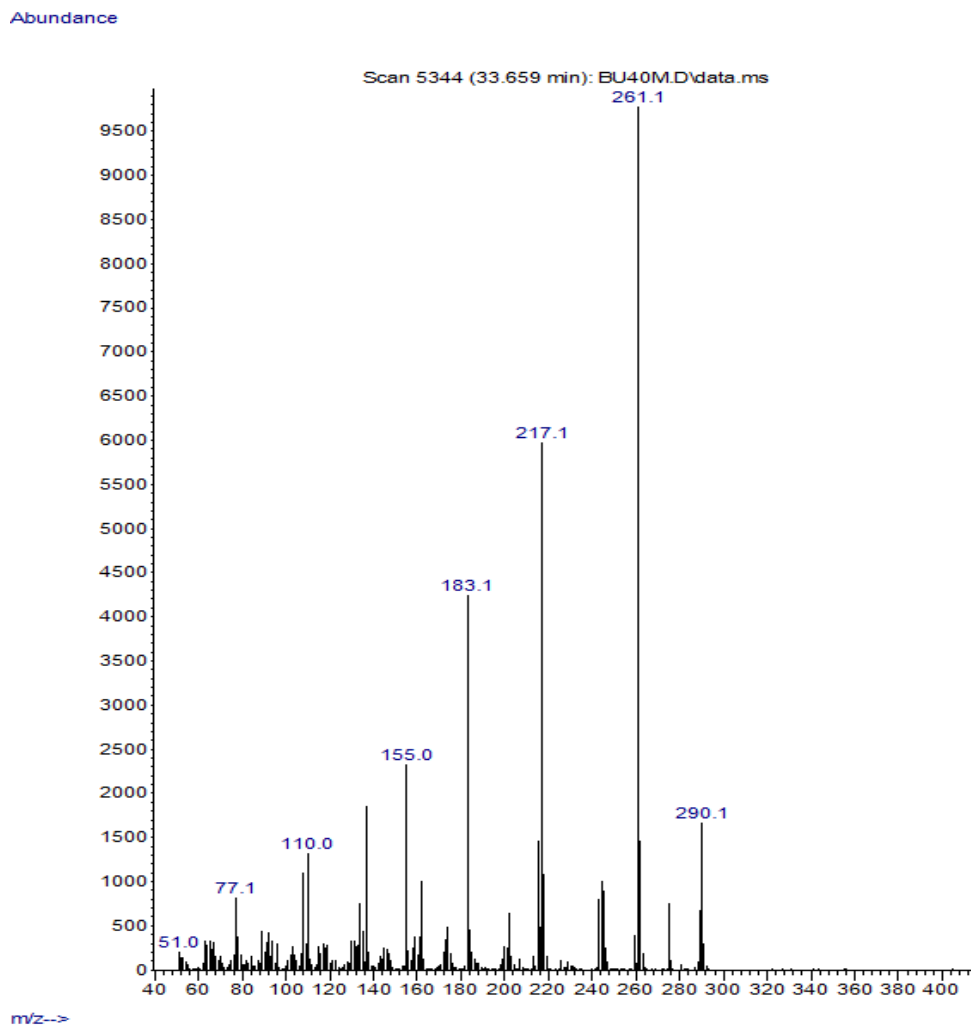

Gas chromatogram and mass spectrum of B5 (MW: 290)

Abundance

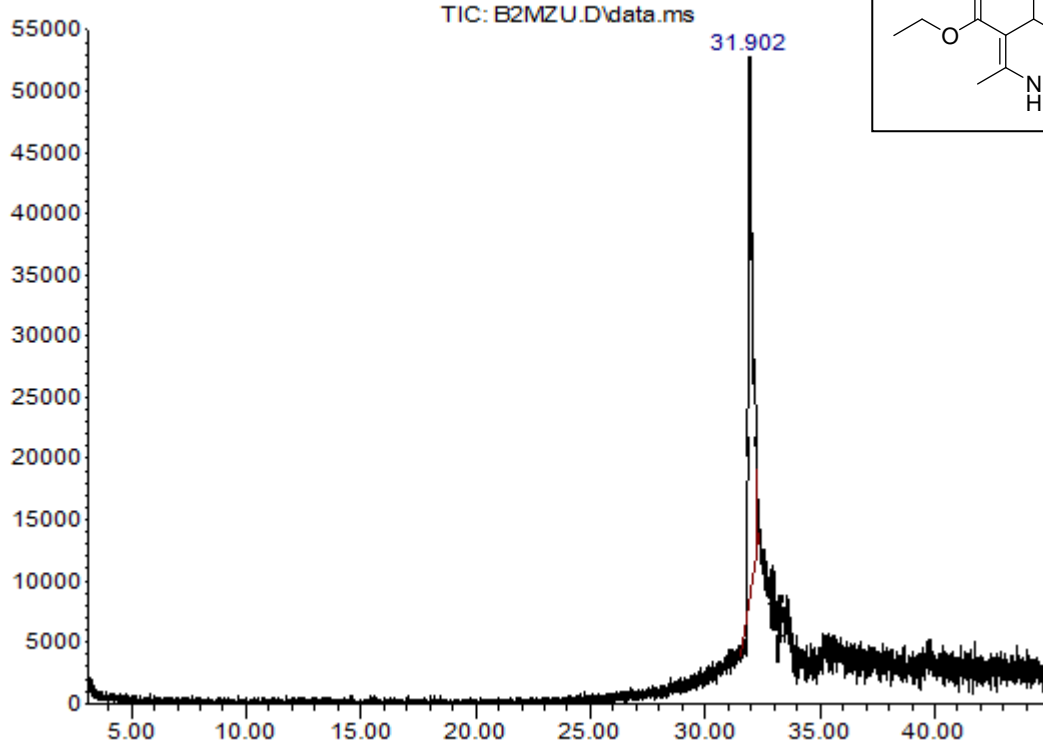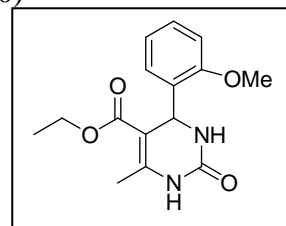

Time-->

Abundance

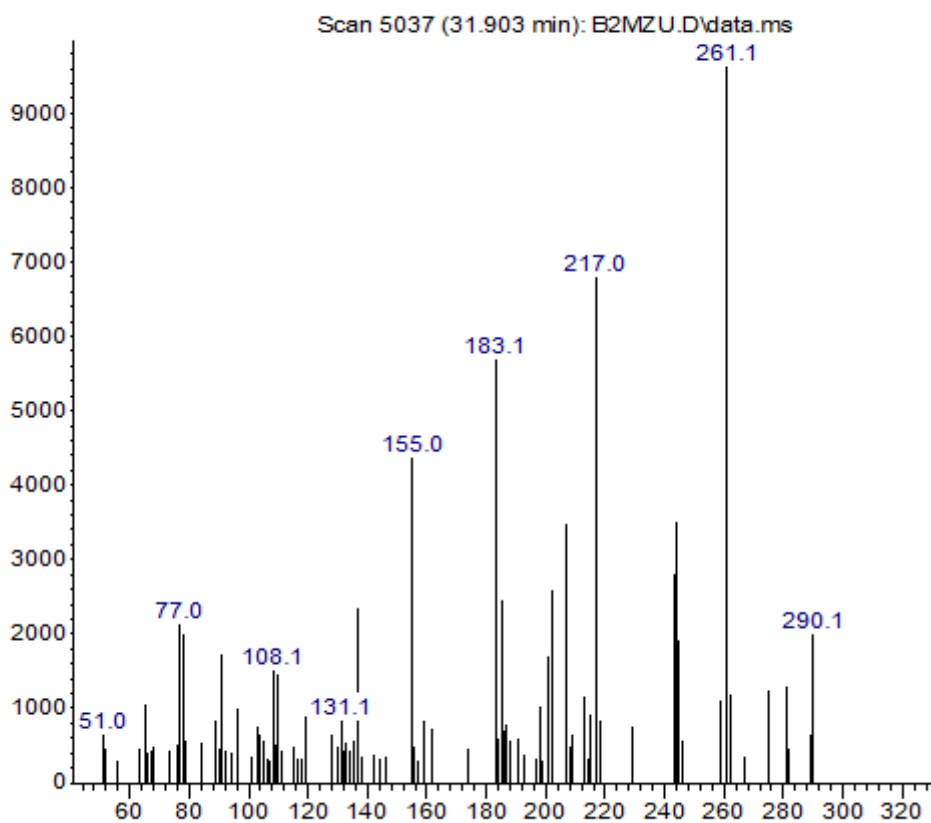

m/z-->

# Gas chromatogram and mass spectrum of B6 (MW: 320)

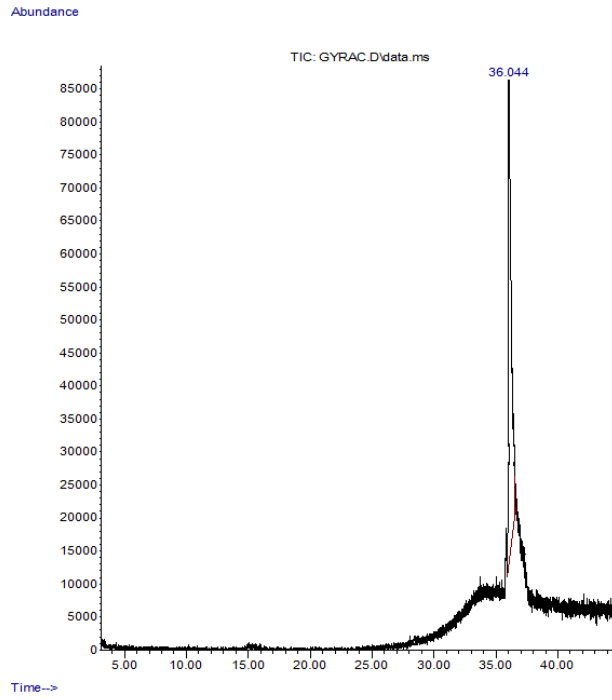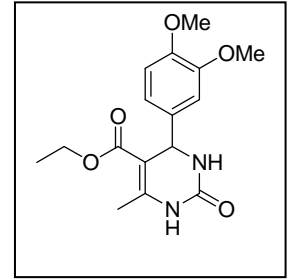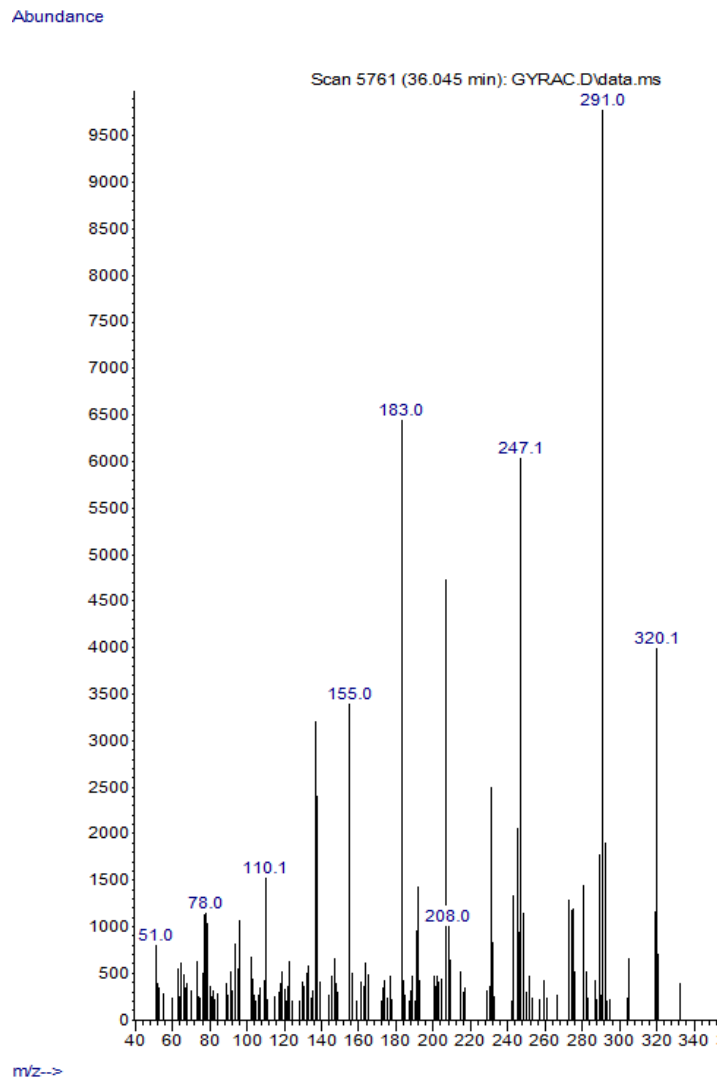

Gas chromatogram and mass spectrum of B7 (MW: 266)

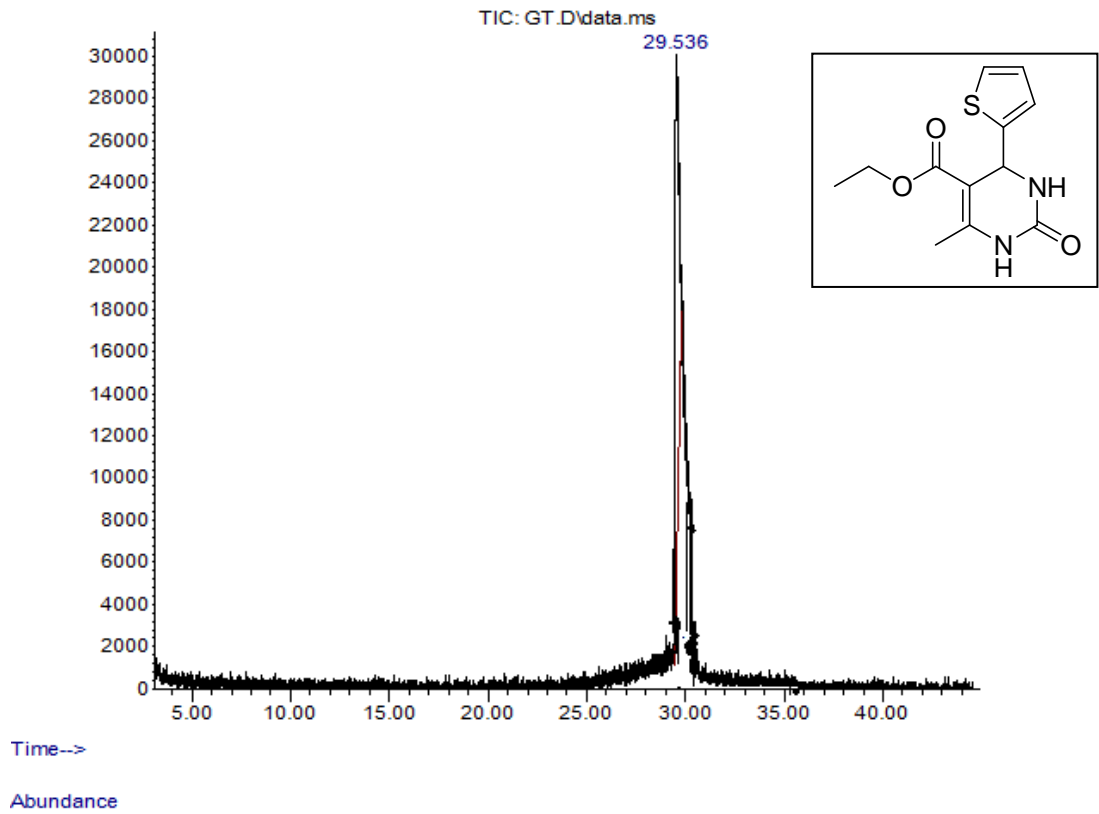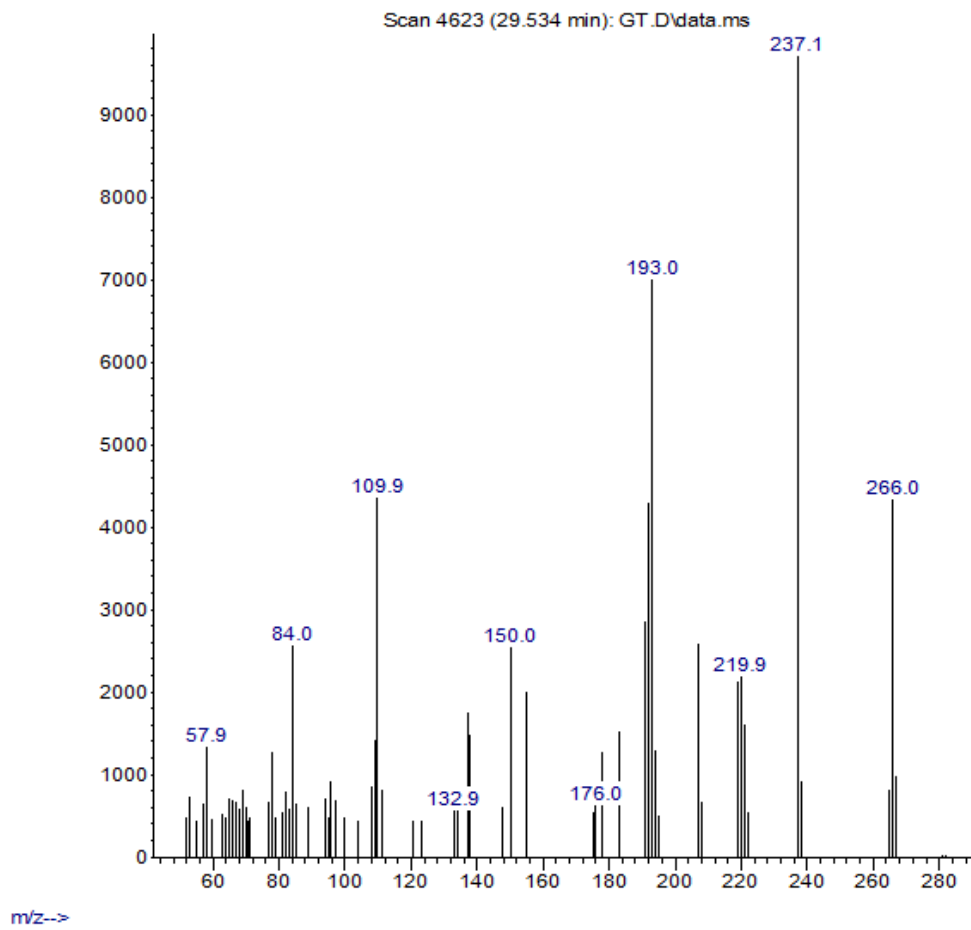

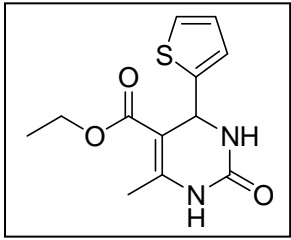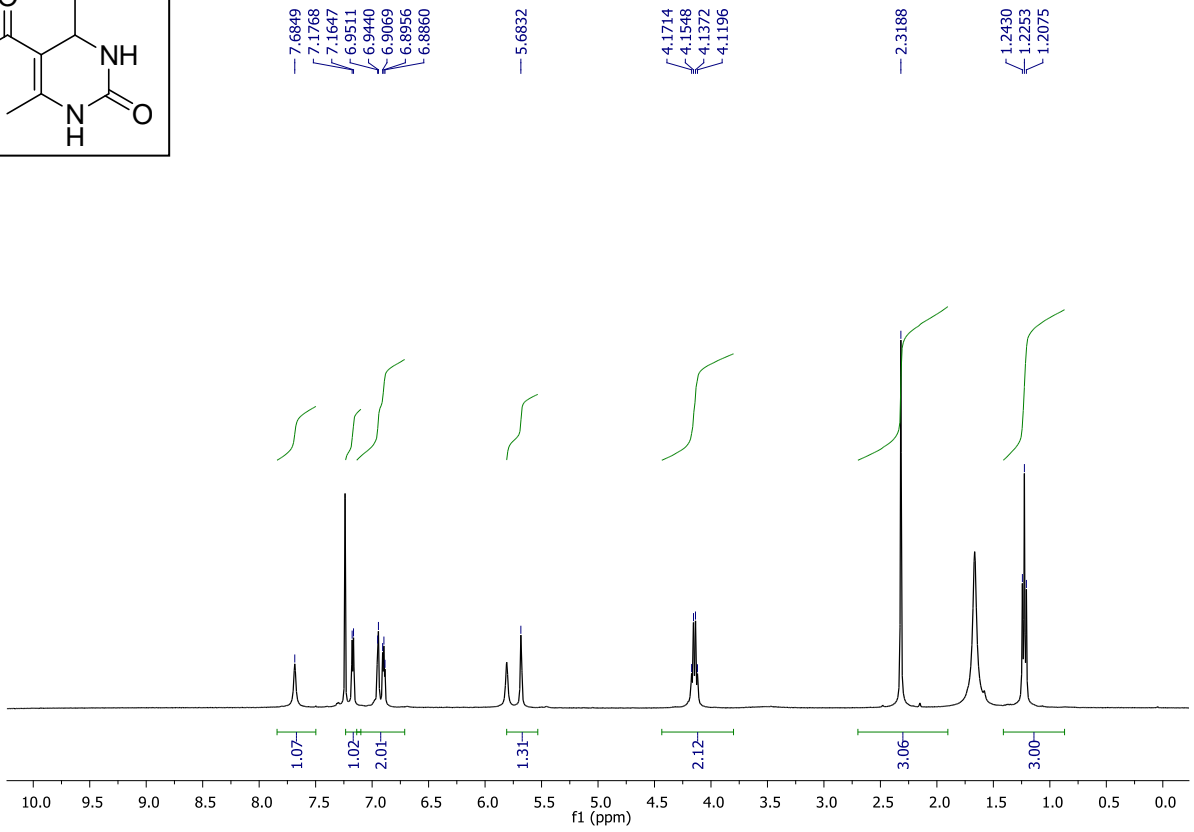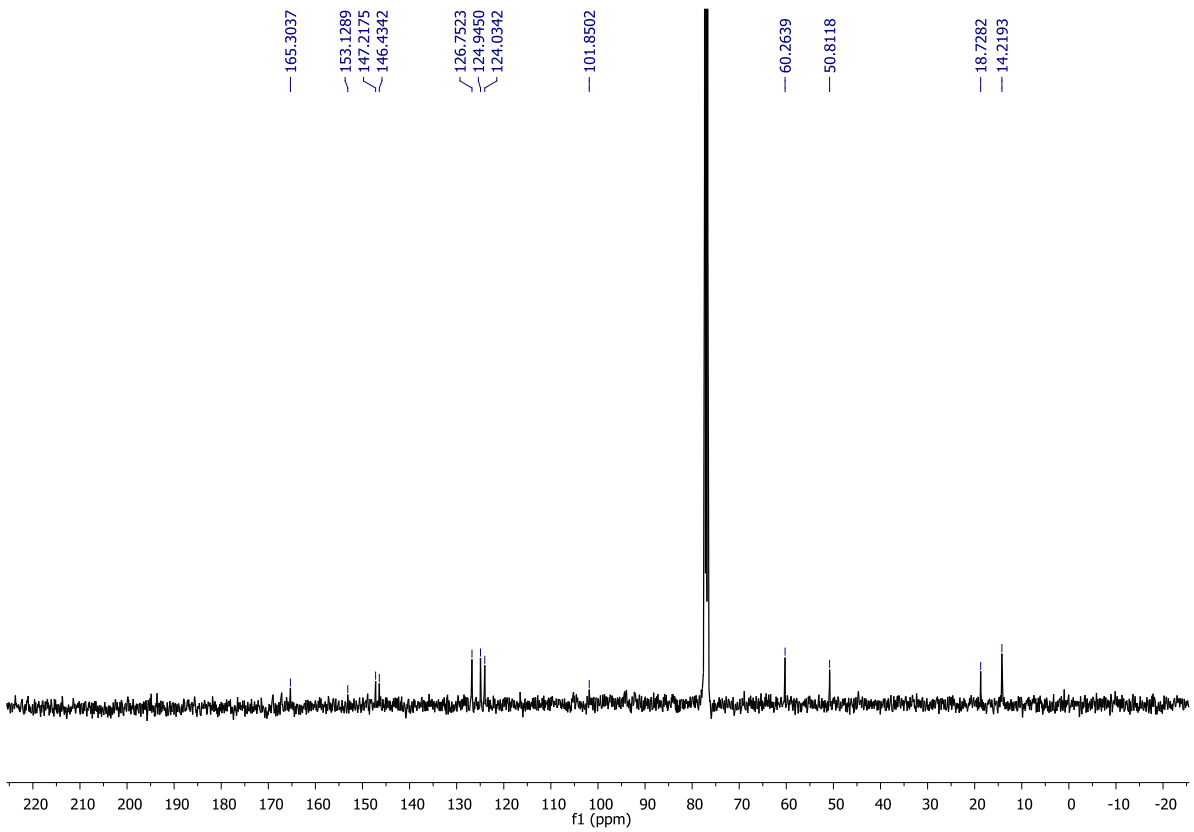

# Gas chromatogram and mass spectrum of B8 (MW: 276)

Abundance

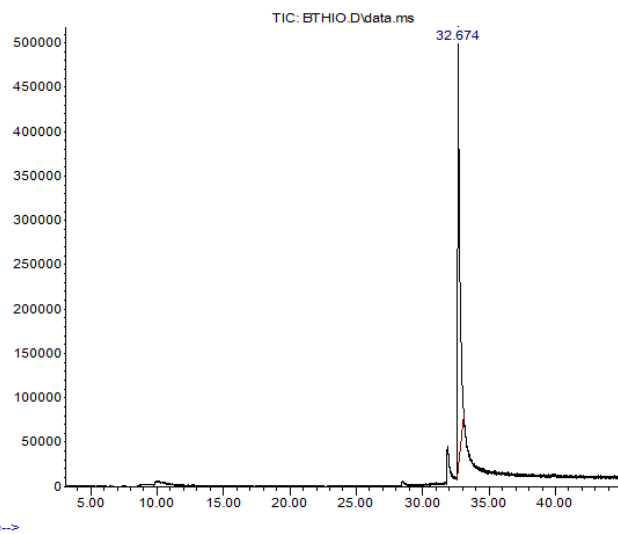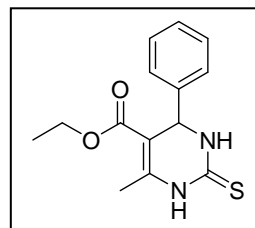

Abundance

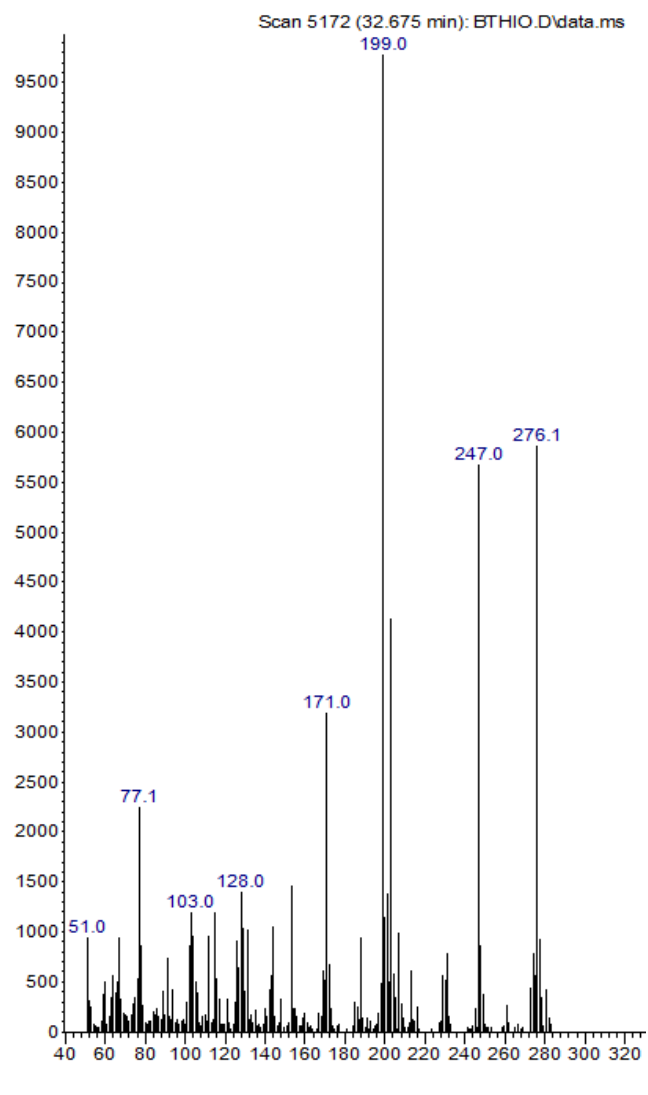

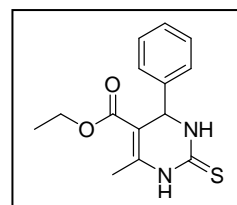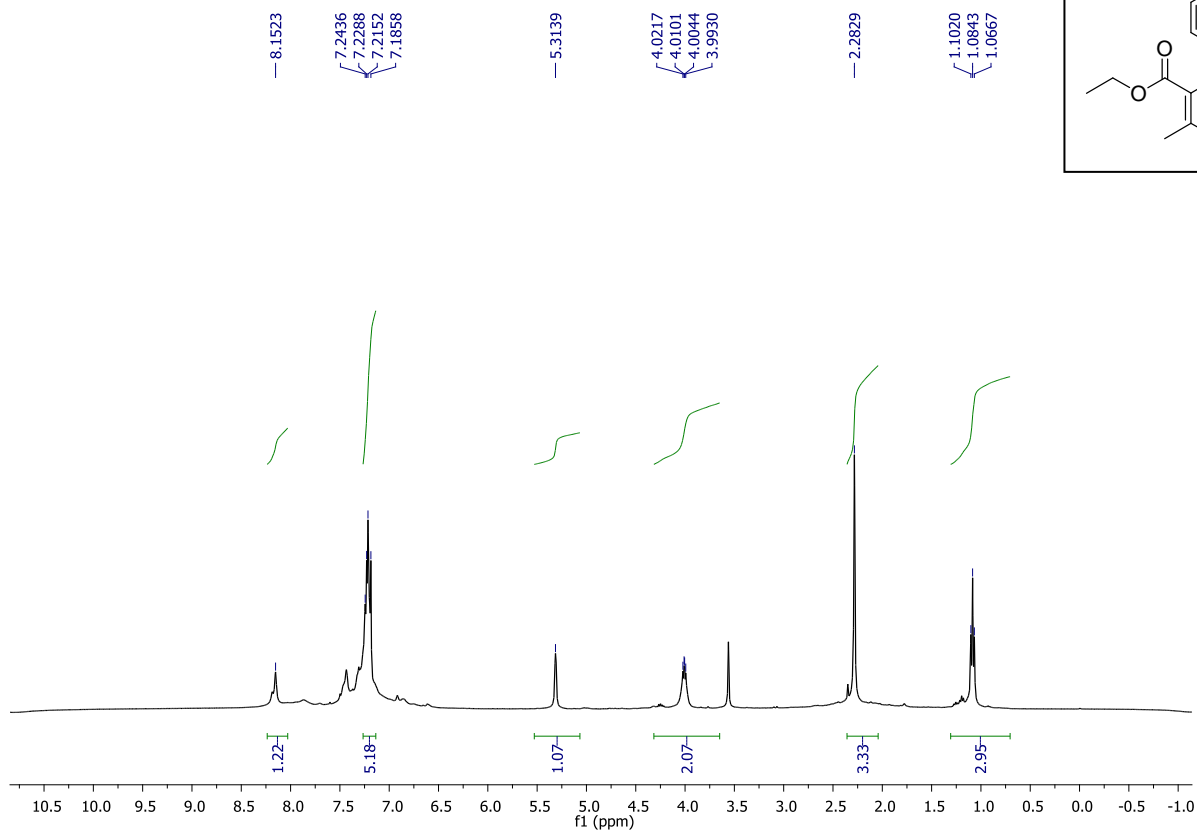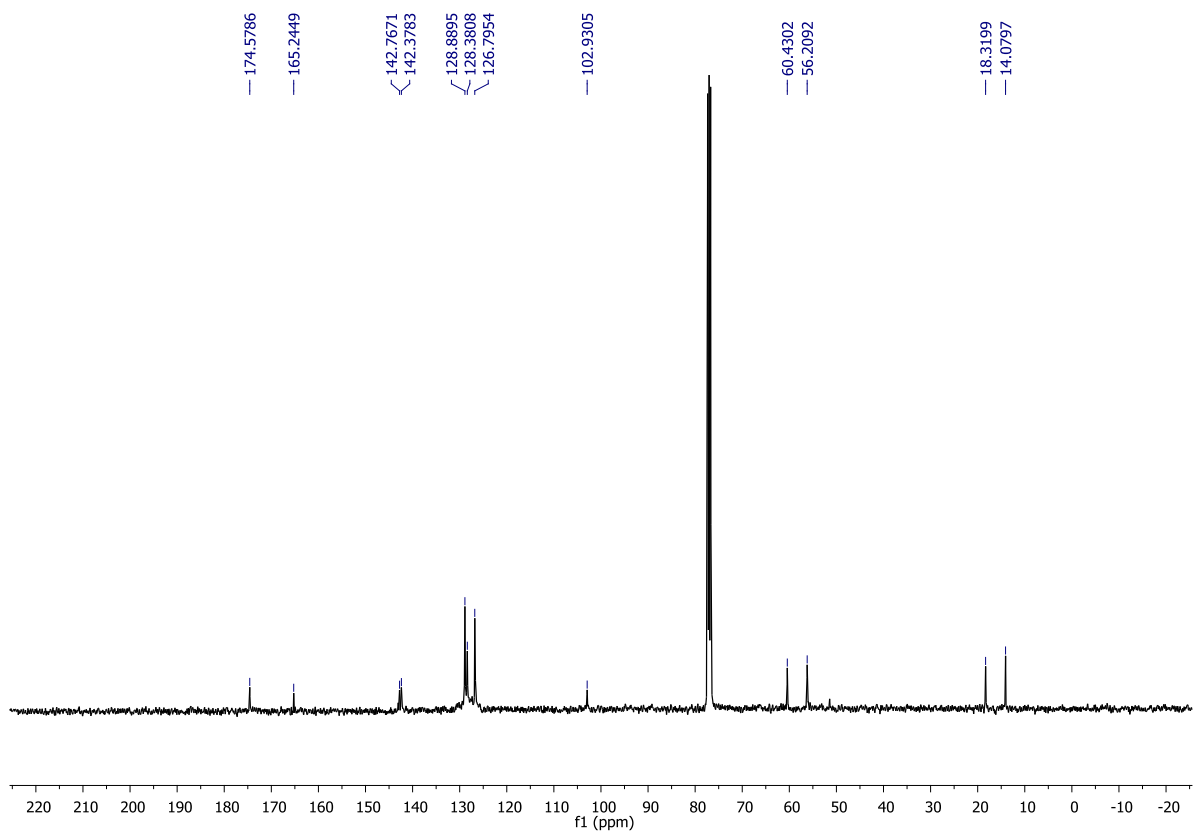



# Gas chromatogram and mass spectrum of B9 (MW: 310)

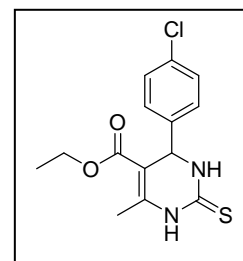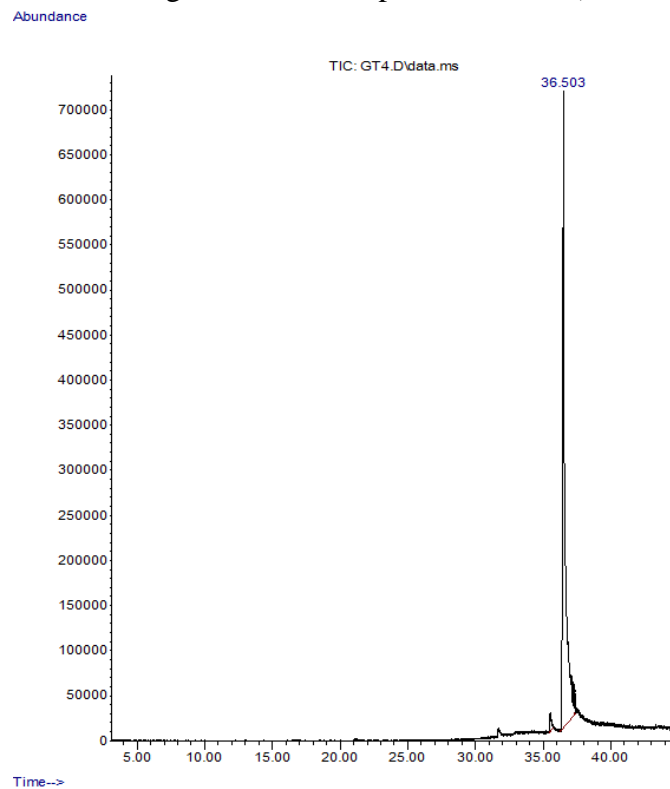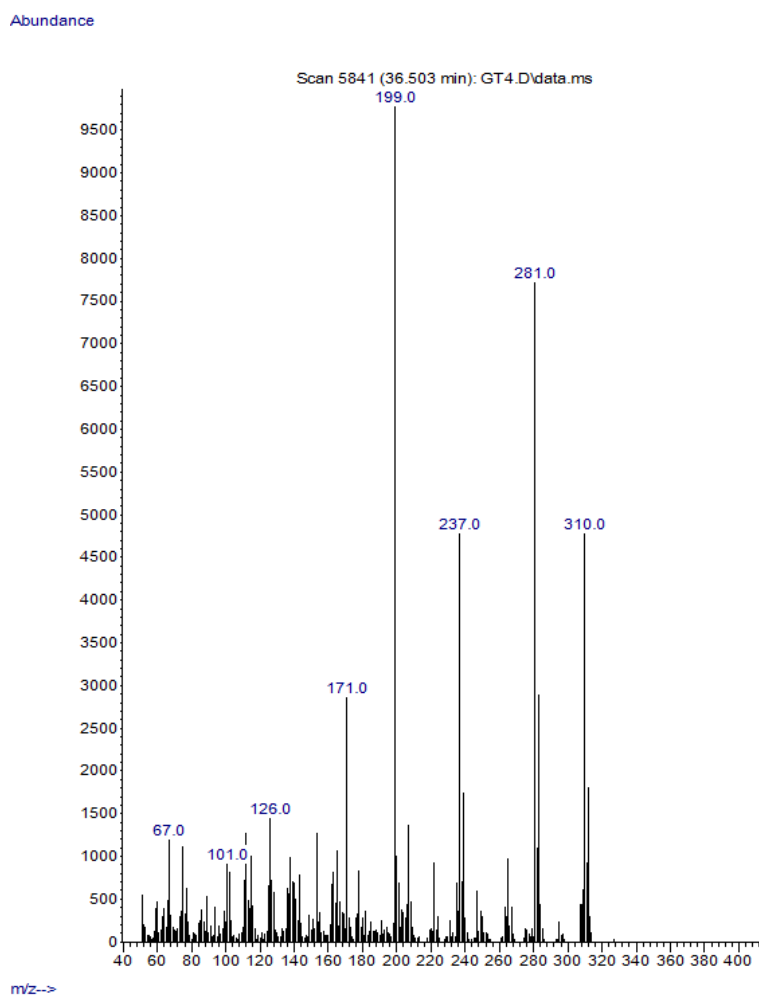

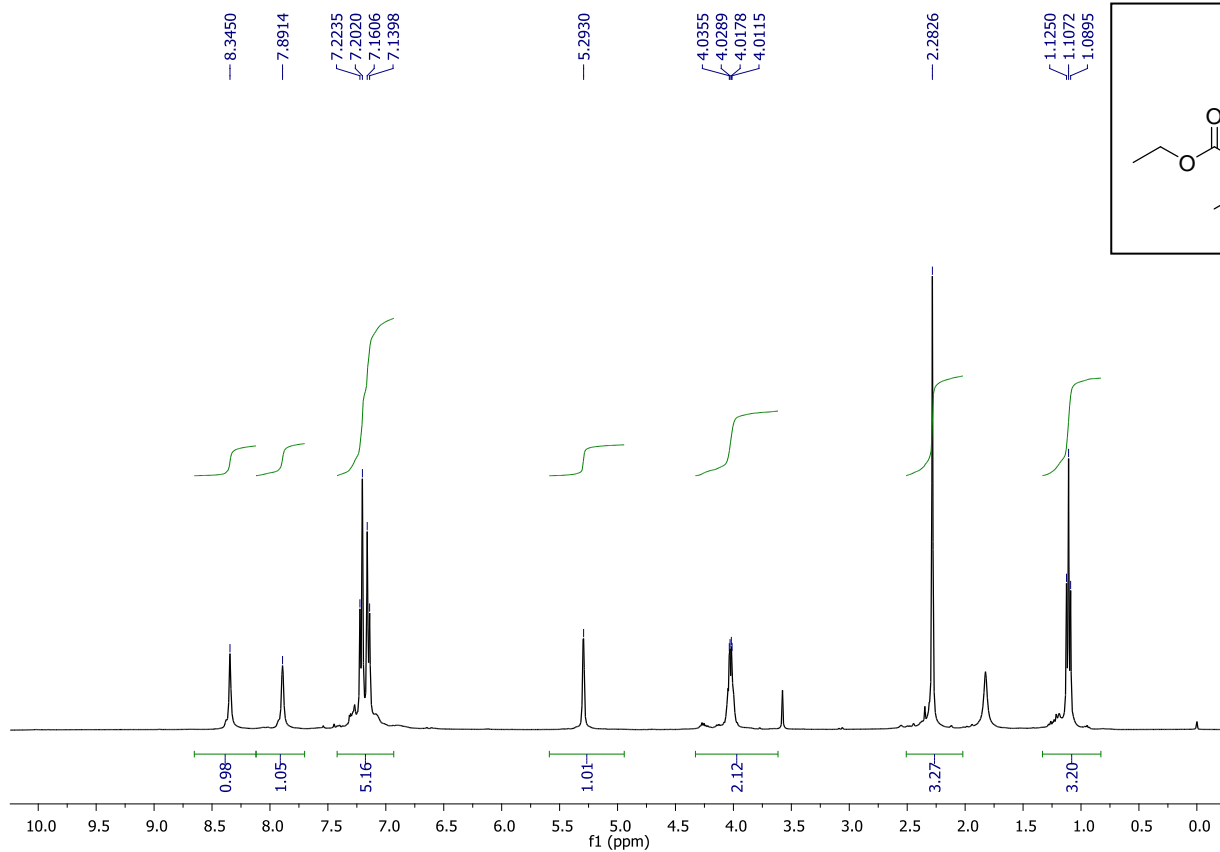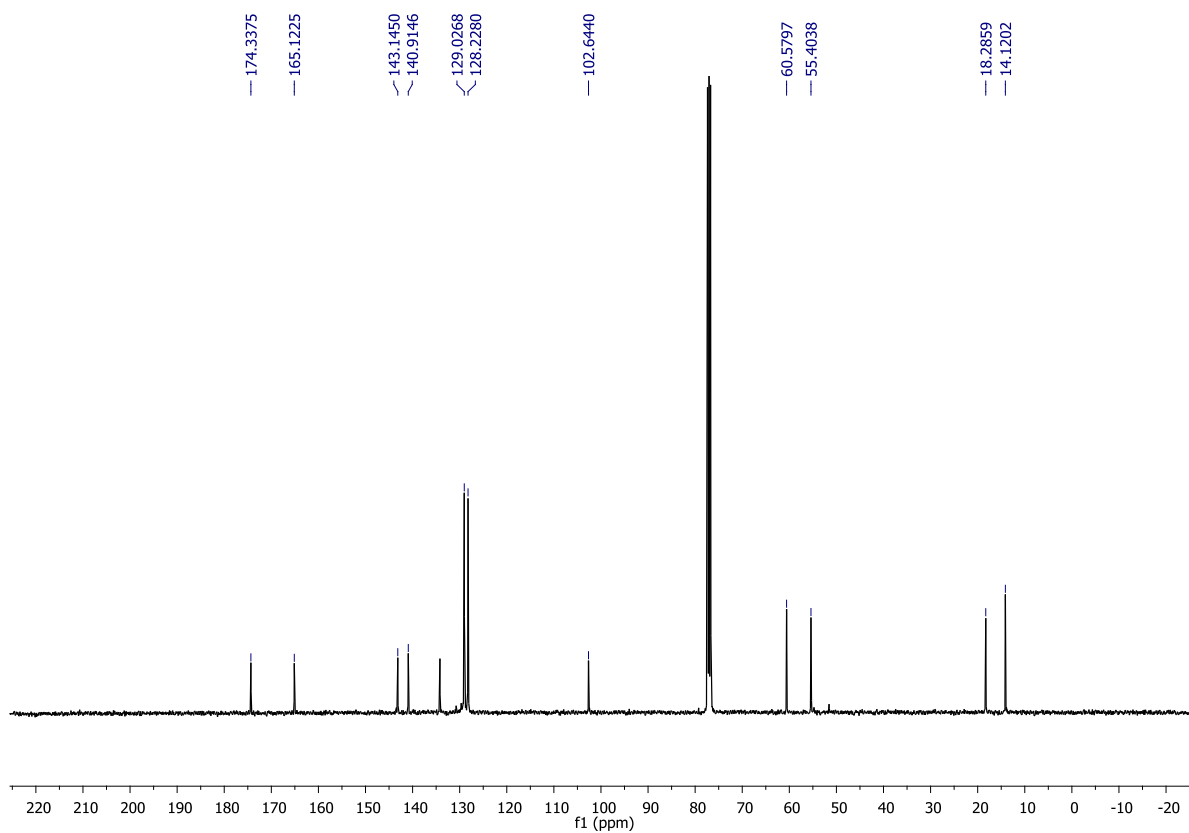

# Gas chromatogram and mass spectrum of B10 (MW: 354)

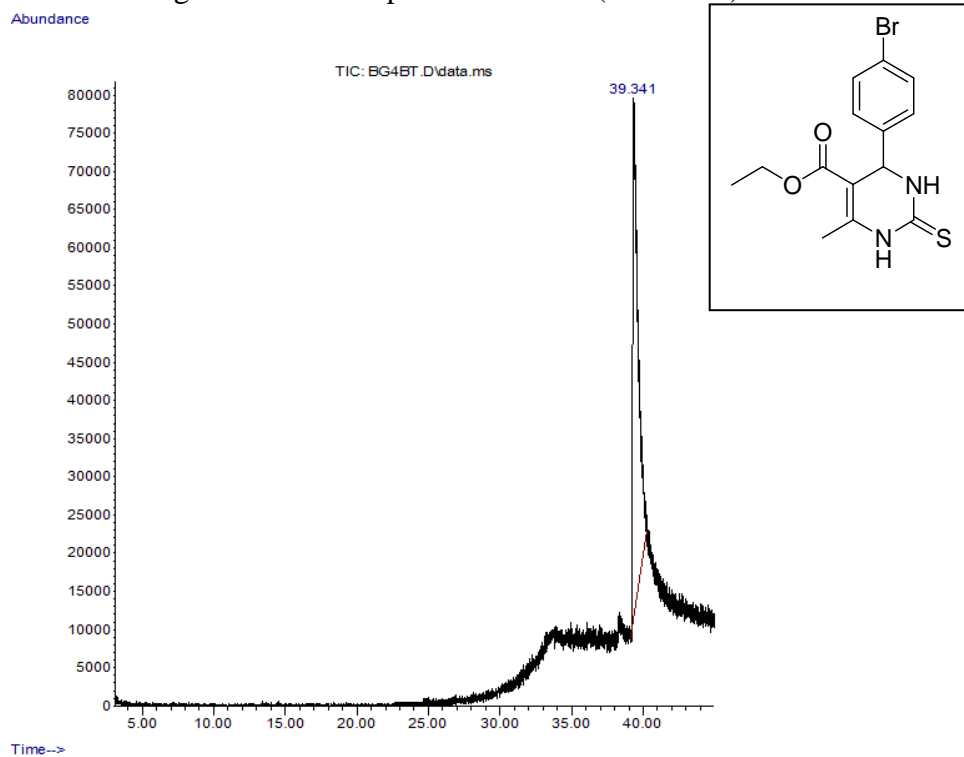

Abundance

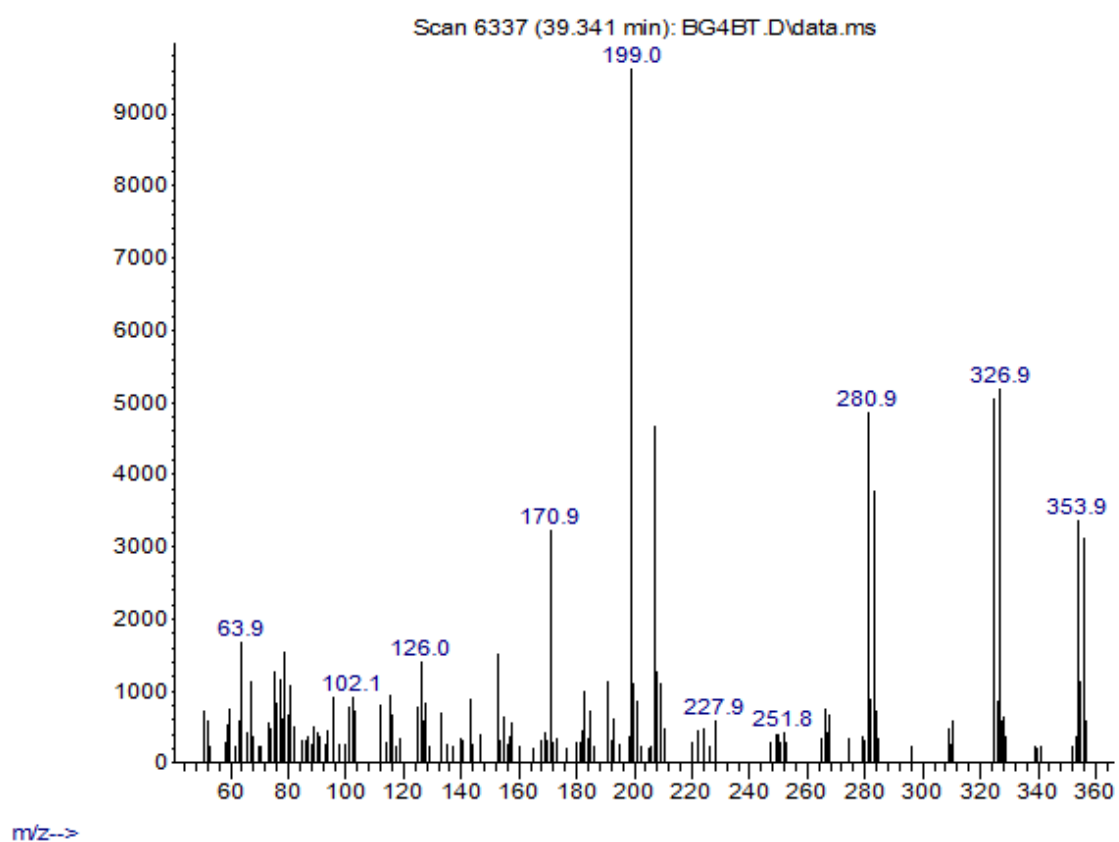

# Gas chromatogram and mass spectrum of B6 (MW: 306)

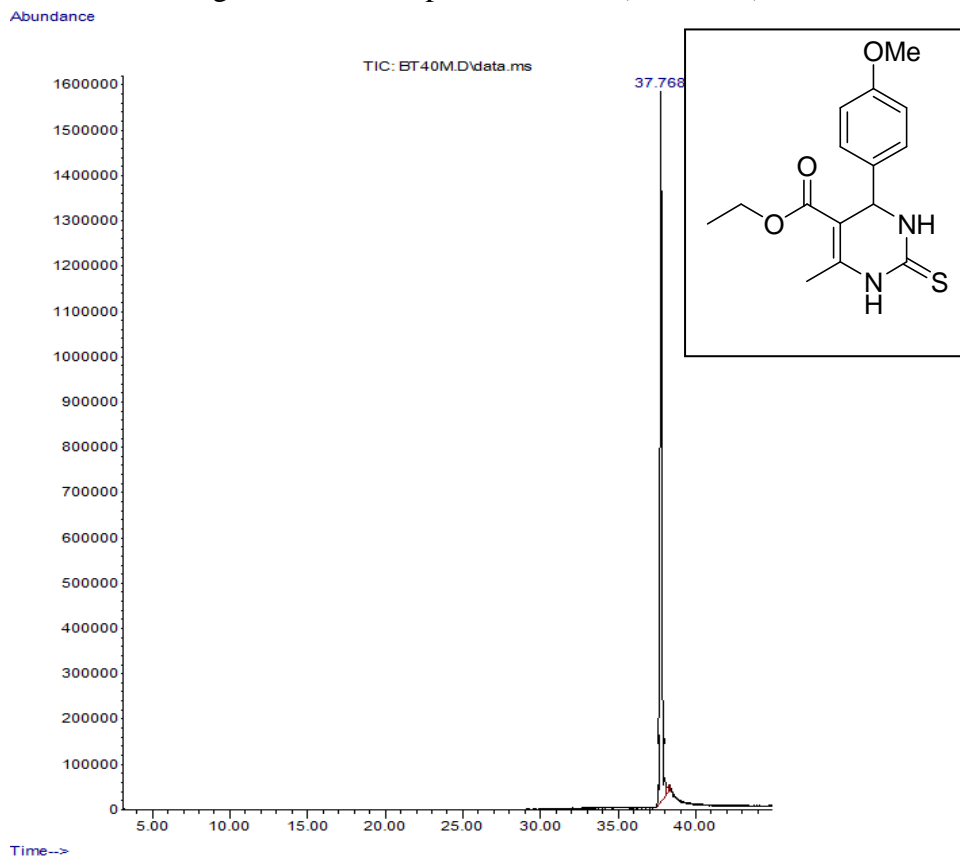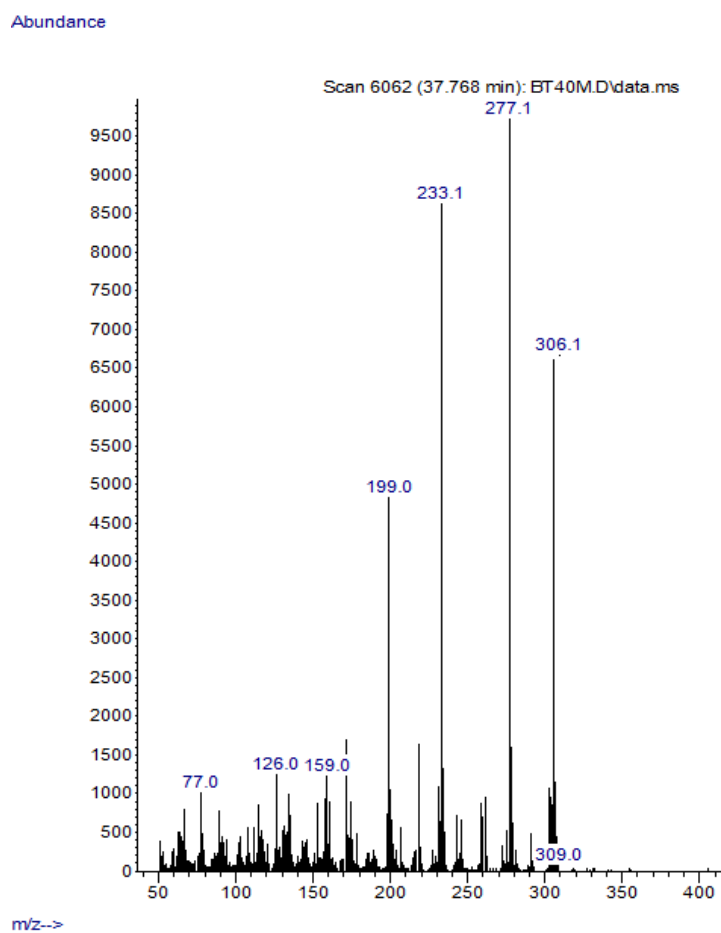

Gas chromatogram and mass spectrum of B6 (MW: 336)

Abundance

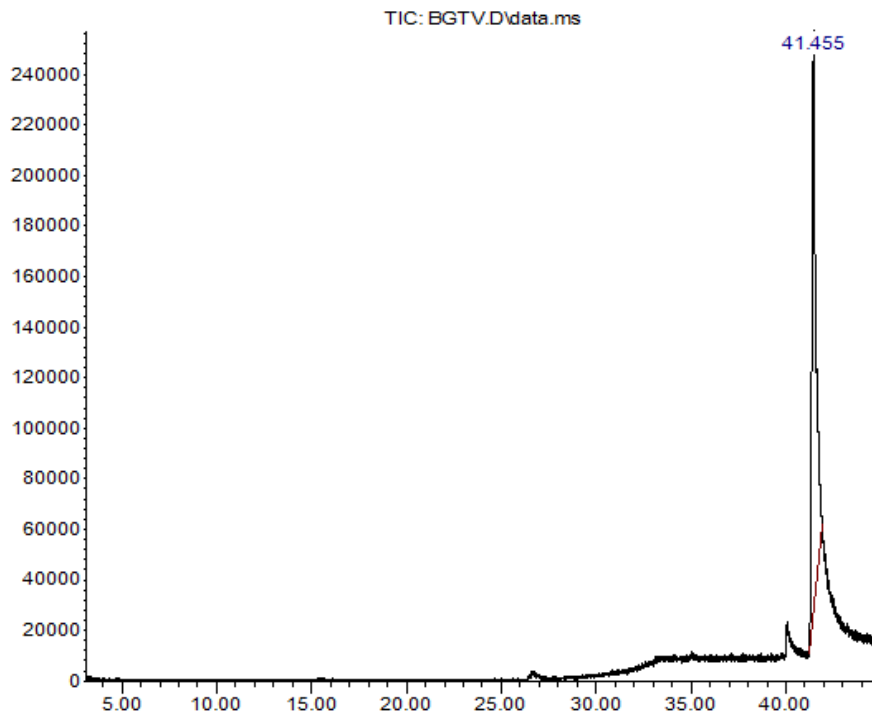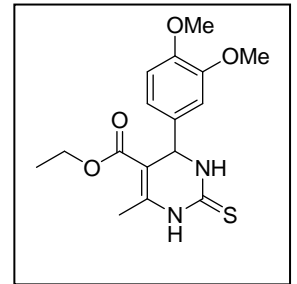

Abundance

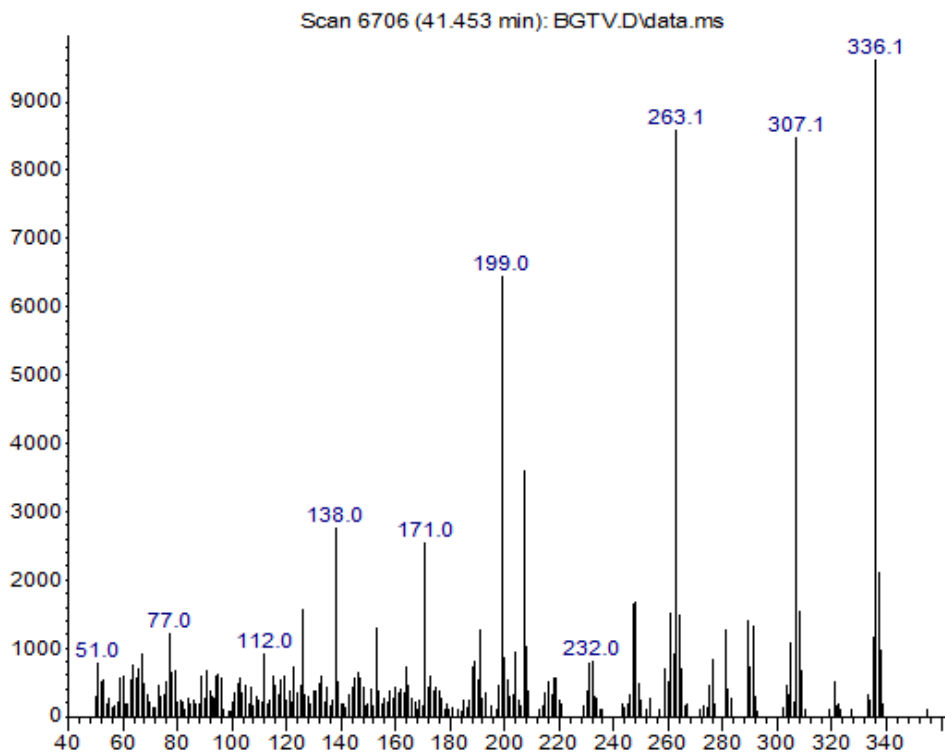

## References

1. N. Fu, Y. Yuan, Z. Cao, S. Wang, J. Wang, and C. Peppe, *Tetrahedron*, 2002, **58**, 4801-4807.
2. G. Aridoss and Y. T. Jeong, *Bull. Korean Chem. Soc.* 2010, **31**, 863-868.
3. J. S. Yadav, B. V. S. Reddy, K. B. Reddy, K. S. Raj and A. R. Prasad, *J. Chem. Soc., Perkin Trans.*, 2001, **1**, 1939-1941.
4. S. Kolb, O. Mondesert, M. Goddard, D. Jullien, B. O. Villoutreix, B. Ducommun, C. Garbay and E. Braud, *ChemMedChem*, 2009, **4**, 633-648.
